# Supplementary material for: Ultrastructural heterogeneity of layer 4 excitatory synaptic boutons in the adult human temporal lobe neocortex
Source: eLife. 2019 Nov 20;8:e48373. doi: 10.7554/eLife.48373 (PMC6919978; doi:10.7554/eLife.48373)
Supplement: Source data 2. [file elife-48373-data2.xlsx]

## Sheet: Kurt_Original_Data Summary
	SB name	SB number	SB x position	SB y position	SB z position	SB volume	SB surface area	SB sphericity	PreAZ number	PreAZ surface area	PreAZ sd	PreAZ perimeter	PSD surface area	PSD perimeter	Mitochondria number	Mitochondria volume	Mitochondria %volume	SVs number	SVs volume	SVs %volume	SVs diameter mean	SVs diameter sd	SVs p10	SVs p20	SVs p30	SVs p40	SVs p50	SVs p60	SVs p70	SVs p80	SVs p90	SVs p100	SVs p200	SVs p300	SVs p400	SVs p500	DCV number	DCV volume	DCV %volume	DCV diameter mean	DCV diameter sd
1	Hu_110402_VII_Rachida_01	1	1123.62	155.506	2050.95	0.0608428	1.19409	0.626497	1	0.113502	NA	1.25762	0.150766	1.6705	0	NA	NA	870	0.00409612	6.7323	20.1991	3.56176	14	33	56	83	108	134	167	189	225	250	567	639	639	639	0	NA	NA	NA	NA
2	Hu_110402_VII_Rachida_02_03	2	813.262	-654.357	3601.73	0.127147	2.43959	0.501231	1	0.141672	NA	1.69932	0.171044	2.05163	1	0.0117781	9.2634	1528	0.0068074	5.35395	19.5737	4.09582	5	37	70	103	138	169	200	233	268	303	559	745	896	972	22	0.000849375	0.668025	40.7544	7.08882
3	Hu_110402_VII_Rachida_02_03	3	449.444	-946.053	2605.3	0.245724	4.31181	0.440004	2	0.121022	0.0229248	1.44351	0.116036	1.37847	1	0.0262637	10.6883	2684	0.0140613	5.72238	20.4252	4.87064	51	107	164	233	289	331	372	413	446	490	743	1099	1387	1627	13	0.000341685	0.139052	36.3242	4.80173
4	Hu_110402_VII_Rachida_04	4	-269.707	-606.395	2309.66	0.123871	2.46054	0.488391	1	0.100019	NA	1.17034	0.104791	1.22617	1	0.00768412	6.2033	1502	0.00700987	5.65898	19.4175	5.17597	18	39	63	95	120	148	184	217	256	295	705	874	883	883	8	0.00036366	0.293579	43.4211	6.57691
5	Hu_110402_VII_Rachida_05_08	5	-117.628	707.685	1904.68	0.294951	5.2736	0.406329	2	0.171762	0.18836	2.1137	0.203359	2.49381	2	0.0248033	8.40929	4252	0.0214294	7.2654	19.954	5.2935	0	38	95	150	214	287	350	411	479	552	1190	1609	1672	1682	16	0.000345947	0.117289	30.6444	12.3521
6	Hu_110402_VII_Rachida_05_08	8	286.224	1854.74	1618.74	0.147344	2.43724	0.553529	1	0.181865	NA	1.91553	0.249503	2.62793	1	0.0233663	15.8584	2248	0.00710963	4.8252	17.213	4.19469	40	94	149	206	258	317	368	415	473	523	954	1359	1463	1465	0	NA	NA	NA	NA
7	Hu_110402_VII_Rachida_06_07	6	1109.36	-464.656	1217	0.0951724	2.10097	0.479813	1	0.118367	NA	1.48331	0.116314	1.45759	1	0.0142557	14.9788	1415	0.0047767	5.01899	17.4789	4.53589	24	55	82	119	142	162	198	224	243	267	432	530	561	571	3	5.41465e-05	0.0568931	32.4438	2.20771
8	Hu_110402_VII_Rachida_06_07	7	1013.81	-913.332	731.684	0.143868	2.04713	0.648605	1	0.0970483	NA	1.29945	0.103332	1.38359	1	0.0200401	13.9296	2003	0.00791609	5.50234	18.6489	4.35274	16	34	58	74	90	113	147	167	199	234	543	778	950	956	3	5.90871e-05	0.0410704	33.495	0.74915
9	Hu_110402_VII_Rachida_09_10	9	1682.46	-865.735	3398.2	0.0874803	1.7984	0.529913	1	0.138049	NA	1.5962	0.14612	1.68952	1	0.00890736	10.1821	1842	0.00536122	6.12849	16.5826	4.36277	42	86	139	187	237	285	334	372	411	456	746	908	936	936	2	6.41428e-05	0.0733225	39.4163	0.4672
10	Hu_110402_VII_Rachida_09_10	10	1849.82	-1252.22	3013.25	0.0456791	1.14186	0.541192	1	0.0907588	NA	1.01549	0.0961148	1.07542	0	NA	NA	1160	0.00357616	7.82889	17.0976	4.11531	19	52	94	128	164	197	238	279	319	355	781	871	901	908	0	NA	NA	NA	NA
11	Hu_110402_VII_Rachida_11_12	11	865.024	423.661	672.043	0.0800694	2.07954	0.432011	1	0.149024	NA	1.83891	0.136989	1.69039	1	0.00883108	11.0293	1315	0.00438077	5.47121	17.0923	4.97815	45	94	147	196	230	268	297	320	341	369	466	514	566	580	0	NA	NA	NA	NA
12	Hu_110402_VII_Rachida_11_12	12	1392.41	235.138	1509.06	0.0628604	1.56913	0.48724	1	0.0964364	NA	1.29466	0.108556	1.45737	0	NA	NA	1532	0.00456889	7.2683	16.7211	4.42842	45	84	115	151	177	204	228	249	272	294	503	640	720	739	2	7.34893e-05	0.116909	41.0643	3.8882
13	Hu_110402_VII_Rachida_13_15	13	994.135	-763.221	1791.14	0.0523817	1.3902	0.486998	1	0.0863903	NA	0.943756	0.0868108	0.94835	0	NA	NA	1678	0.00411844	7.86237	15.6163	4.19869	42	84	123	167	191	207	223	242	256	274	338	338	338	338	0	NA	NA	NA	NA
14	Hu_110402_VII_Rachida_13_15	15	908.693	-980.738	1192.3	0.0889557	1.98236	0.486129	1	0.112226	NA	1.33127	0.112991	1.34035	0	NA	NA	2190	0.00689498	7.75103	17.0837	4.42092	28	44	111	145	183	228	264	309	343	385	788	1100	1311	1380	6	0.000219312	0.24654	41.0425	2.56125
15	Hu_110402_VII_Rachida_14	14	1636.97	344.731	1845.54	0.0463168	1.36009	0.458573	1	0.0628082	NA	0.677564	0.0691444	0.745918	0	NA	NA	1153	0.00305768	6.60167	16.0625	4.2333	8	30	51	74	87	95	106	115	129	140	282	387	475	543	0	NA	NA	NA	NA
16	Hu_110402_VII_Rachida_16_17	16	-1468.76	-3152.08	1351.36	0.102301	2.5765	0.410558	1	0.160959	NA	1.89697	0.183467	2.16224	1	0.00684566	6.69168	2591	0.00681398	6.66071	16.1676	3.98962	53	121	195	266	333	398	480	549	618	713	1559	1720	1729	1729	0	NA	NA	NA	NA
17	Hu_110402_VII_Rachida_16_17	17	-990.532	-3553.28	1198.06	0.0372239	1.02723	0.524846	1	0.0640383	NA	0.703246	0.0862846	0.947548	0	NA	NA	1154	0.00288062	7.73862	15.7988	4.10761	12	45	75	110	140	162	184	203	221	247	476	506	506	506	4	0.000106505	0.286121	36.4441	5.46454
18	Hu_110402_VII_Rachida_18	18	918.752	-3377.51	2161.53	0.145233	2.89032	0.46229	1	0.145927	NA	1.8142	0.155881	1.93795	1	0.0174533	12.0174	3279	0.00864755	5.95426	16.0005	4.31364	34	80	131	186	234	279	315	354	391	418	691	1023	1322	1624	2	6.28017e-05	0.0432421	39.0913	1.99978
19	Hu_110402_VII_Rachida_19	19	130.729	-1581.82	2474.48	0.0948326	2.13012	0.472119	1	0.12428	NA	1.12851	0.108296	0.983375	0	NA	NA	2819	0.00668384	7.04804	15.4994	4.04693	31	53	101	158	202	247	301	353	411	447	737	768	768	768	9	0.000353763	0.373039	41.3244	6.5152
20	Hu_110402_VII_Rachida_20_21	20	-1437.16	-368.995	2146.41	0.151801	3.84064	0.358314	3	0.0948643	0.0499743	1.08686	0.101384	1.16113	3	0.0122916	8.09714	3866	0.0101305	6.67352	16.2046	3.8761	87	211	340	487	633	795	931	1087	1228	1346	2091	2536	2713	2805	2	7.64249e-05	0.0503453	41.4948	4.96416
21	Hu_110402_VII_Rachida_20_21	21	-1228.1	-390.847	2543.71	0.0509285	1.63616	0.406099	1	0.0890466	NA	0.955787	0.0892252	0.957704	1	0.0100124	19.6597	1239	0.00292136	5.73619	15.3442	4.26942	35	79	127	174	199	245	276	303	317	342	442	442	442	442	2	4.34688e-05	0.0853525	34.6119	0.933056
22	Hu_110402_VII_Rachida_22_23	22	850.134	-1629.59	2834.15	0.158948	2.78702	0.509152	1	0.161083	NA	1.7363	0.153991	1.65985	1	0.0224785	14.142	2816	0.0115177	7.2462	18.4111	5.24875	29	74	124	180	235	298	365	418	466	508	830	1022	1136	1175	3	7.38282e-05	0.0464479	35.9778	2.4315
23	Hu_110402_VII_Rachida_22_23	23	2084.13	-1964.42	1911.94	0.128137	2.11737	0.580502	1	0.208246	NA	2.3689	0.208356	2.37015	1	0.0204464	15.9567	3057	0.00858646	6.70101	16.5023	4.12078	79	158	242	337	426	495	560	622	680	724	1071	1193	1251	1256	1	3.12499e-05	0.0243879	39.0796	NA
24	Hu_110402_VII_Rachida_24_25	24	4003.72	-1818.19	2261.58	0.0388157	0.855836	0.647786	1	0.100768	NA	1.09931	0.124437	1.35752	0	NA	NA	1378	0.00453573	11.6853	17.0514	5.0233	30	70	115	146	195	226	268	304	342	379	827	1078	1113	1113	0	NA	NA	NA	NA
25	Hu_110402_VII_Rachida_24_25	25	4359.11	-1863.53	2184.59	0.10718	1.88871	0.577733	1	0.115885	NA	1.38112	0.10552	1.25759	1	0.0187426	17.4871	2728	0.00635743	5.93157	15.0663	4.61557	44	95	153	196	240	283	316	358	400	434	634	827	1153	1360	0	NA	NA	NA	NA
26	Hu_110402_VII_Rachida_26	26	-1558.66	2080.64	2218.94	0.0396475	0.894939	0.628301	1	0.0842027	NA	1.15365	0.0734331	1.0061	0	NA	NA	813	0.00337465	8.51164	18.9555	4.42801	26	55	81	109	140	167	203	244	275	314	442	451	451	451	0	NA	NA	NA	NA
27	Hu_110402_VII_Rachida_27	27	910.309	1513.07	2165.14	0.147854	2.62278	0.515558	1	0.266746	NA	2.96318	0.253528	2.81634	0	NA	NA	2611	0.0102335	6.92138	18.4014	4.72999	2	46	118	200	300	375	438	511	608	704	1720	2007	2008	2008	4	0.000116068	0.078502	37.5616	5.35656
28	Hu_110402_VII_Rachida_28_29_30	28	-2270.66	-157.503	2325.58	0.101088	1.83603	0.571572	1	0.200277	NA	2.17021	0.189109	2.0492	1	0.00889731	8.80151	1438	0.00526241	5.20575	17.6215	5.18237	0	4	51	105	155	203	246	279	309	342	535	690	694	694	3	6.33342e-05	0.0626522	32.945	8.25134
29	Hu_110402_VII_Rachida_28_29_30	29	-1503.89	-851.965	1970.49	0.140887	2.92628	0.447455	1	0.205259	NA	2.18954	0.198891	2.1216	2	0.0197717	14.0337	2111	0.00839944	5.96181	18.5872	4.51454	0	0	0	0	2	38	81	125	177	228	679	1071	1334	1418	17	0.000679317	0.48217	41.9222	4.64789
30	Hu_110402_VII_Rachida_28_29_30	30	-2178.88	-784.741	2186.38	0.287199	4.62197	0.455455	1	0.313872	NA	3.6753	0.289795	3.39337	4	0.0472643	16.457	4014	0.0152783	5.31976	18.4229	4.2267	0	41	170	275	395	511	623	735	854	954	1622	1989	2123	2151	26	0.000675262	0.23512	36.266	4.24807
31	Hu_110402_VII_Rachida_31_32_33	31	2104.9	-154.259	1567.44	0.140671	2.39462	0.54624	1	0.125463	NA	1.52472	0.123462	1.50041	2	0.0329742	23.4407	1904	0.00700091	4.97681	18.0271	4.54959	4	20	49	84	117	140	152	168	181	189	240	273	274	274	4	8.78564e-05	0.0624554	34.155	5.35698
32	Hu_110402_VII_Rachida_31_32_33	32	1871.5	199.041	1642.98	0.0615651	1.23049	0.612769	1	0.0760343	NA	0.96282	0.0475467	0.602083	1	0.00413292	6.71308	1109	0.00402632	6.53993	17.9035	4.64019	33	65	95	128	164	193	213	228	238	256	322	322	322	322	2	3.42145e-05	0.0555745	31.9687	0.107516
33	Hu_110402_VII_Rachida_31_32_33	33	1965.11	-851.345	2121.65	0.0560093	1.6016	0.442016	1	0.0830443	NA	0.942773	0.121953	1.38449	0	NA	NA	799	0.00315084	5.62557	18.4191	4.73618	0	0	0	0	3	21	48	68	100	115	284	360	373	373	0	NA	NA	NA	NA
34	Hu_110402_VII_Rachida_34_35	34	2333.57	-296.647	1997.23	0.0551497	1.28445	0.545499	1	0.0535031	NA	0.525772	0.0642642	0.63152	0	NA	NA	1065	0.00359655	6.52143	17.336	4.77686	17	26	44	55	74	88	104	119	125	135	167	167	167	167	2	5.24958e-05	0.0951879	36.8331	1.6967
35	Hu_110402_VII_Rachida_34_35	35	2137.95	-343.024	1894.67	0.0760256	1.36932	0.633802	1	0.0592921	NA	0.610303	0.0610442	0.628338	1	0.00896545	11.7927	1204	0.00432684	5.6913	17.8491	4.62594	18	31	53	75	94	104	129	154	180	202	292	298	298	298	2	5.85932e-05	0.0770703	38.2378	0.871948
36	Hu_110402_VII_Rachida_36	36	1928.68	-178.4	783.021	0.0621189	1.59224	0.476386	1	0.127038	NA	1.49352	0.123335	1.44999	0	NA	NA	1243	0.00479543	7.71976	18.5031	4.26017	23	73	120	163	214	266	314	354	410	466	736	779	779	779	6	0.000138305	0.222645	34.6989	5.13272
37	Hu_110402_VII_Rachida_37	37	1454.21	-610.825	1988.67	0.168426	2.6065	0.565846	1	0.133747	NA	1.52353	0.111045	1.26493	1	0.00433416	2.57334	3342	0.0125646	7.46003	18.3797	4.15594	31	78	111	143	187	223	253	275	315	344	610	988	1196	1266	4	9.37039e-05	0.0556352	34.9463	5.08402
38	Hu_110402_VII_Rachida_38_39	38	-10.9267	1161.16	1551.08	0.129446	2.1624	0.572278	1	0.127967	NA	1.45532	0.100332	1.14105	1	0.0226942	17.5318	1307	0.00552644	4.26931	19.0125	4.54102	0	0	0	7	32	54	82	109	132	147	302	441	544	617	0	NA	NA	NA	NA
39	Hu_110402_VII_Rachida_38_39	39	260.482	991.726	2167.73	0.0750695	1.79888	0.478399	1	0.100812	NA	1.17452	0.0920468	1.07239	0	NA	NA	1063	0.00413147	5.50353	18.6433	4.09235	0	0	0	9	30	47	71	98	122	141	350	452	456	456	2	8.73255e-05	0.116326	43.5701	3.22106
40	Hu_110402_VII_Rachida_40_41	40	-1221.85	-604.433	1583.46	0.128447	2.39323	0.514419	1	0.114088	NA	1.37816	0.119292	1.44102	2	0.0222819	17.3471	1042	0.00447522	3.48408	18.7705	5.12069	0	0	1	18	38	60	82	103	116	132	237	256	258	258	4	0.00011447	0.0891178	36.6224	8.10855
41	Hu_110402_VII_Rachida_40_41	41	-730.029	-1319.16	2623.76	0.0687638	1.5086	0.538044	1	0.144321	NA	1.64894	0.138148	1.5784	0	NA	NA	1177	0.0044792	6.51389	18.3778	4.35225	31	71	109	140	165	182	207	224	252	274	521	718	771	771	3	7.4789e-05	0.108762	35.7944	4.88886
42	Hu_110402_VII_Rachida_42_43	42	-1183.88	1330.26	2736.68	0.0808994	1.65492	0.546601	1	0.120316	NA	1.47434	0.119701	1.4668	1	0.013752	16.9989	1270	0.00586568	7.25058	19.3856	5.02816	18	50	79	122	151	190	224	257	293	319	480	555	591	594	11	0.000358459	0.443093	38.3526	7.2737
43	Hu_110402_VII_Rachida_42_43	43	-1577.98	971.298	2416.73	0.0627197	1.19767	0.637406	1	0.0906131	NA	1.03384	0.0828169	0.944886	0	NA	NA	1156	0.00439624	7.00935	18.2698	4.54515	0	0	0	12	47	76	109	134	161	190	429	661	800	806	6	0.000225903	0.360178	40.5123	7.17118
44	Hu_110402_VII_Rachida_44	44	483.753	1798.94	2621.38	0.130073	2.47076	0.502471	1	0.17704	NA	1.88199	0.173025	1.83931	1	0.00360041	2.768	1809	0.0102051	7.84566	20.9435	4.97765	2	32	78	121	174	230	277	338	399	450	766	1008	1165	1280	1	3.12404e-05	0.0240176	39.0756	NA
45	Hu_110402_VII_Rachida_45_47_48	45	1164.49	-891.163	2567.5	0.0412772	0.980519	0.589072	1	0.0761913	NA	0.795117	0.0737359	0.769493	0	NA	NA	681	0.0028983	7.02154	19.0744	4.53525	0	14	40	60	75	98	112	133	153	164	308	381	390	390	1	2.60522e-05	0.0631151	36.7803	NA
46	Hu_110402_VII_Rachida_45_47_48	47	1876.27	-1782.16	2291.04	0.0294929	0.888822	0.519375	1	0.0338017	NA	0.318086	0.0367814	0.346126	0	NA	NA	772	0.00272565	9.2417	17.642	4.79169	11	21	30	40	47	56	62	74	84	98	246	290	290	290	8	0.00020285	0.687793	35.7882	5.2005
47	Hu_110402_VII_Rachida_45_47_48	48	598.543	-1021.37	2397.59	0.0933709	1.74884	0.569127	1	0.0764336	NA	0.812768	0.0797588	0.848127	1	0.017198	18.419	2042	0.00640282	6.8574	16.8027	4.84103	35	59	88	116	143	157	179	202	214	234	382	538	662	820	0	NA	NA	NA	NA
48	Hu_110402_VII_Rachida_46	46	-138.216	-3025.37	2219.14	0.0332788	0.793767	0.630332	1	0.0418142	NA	0.409748	0.0426388	0.417829	0	NA	NA	368	0.00173324	5.20823	19.8567	4.3945	8	17	30	44	53	63	73	81	87	95	133	153	153	153	2	4.02175e-05	0.12085	33.3747	4.95606
49	Hu_110402_VII_Rachida_49_52	49	144.717	359.726	3107.52	0.113668	2.7191	0.417333	1	0.133513	NA	1.59985	0.115056	1.37869	0	NA	NA	1412	0.00643082	5.65756	19.0256	5.45785	45	89	129	178	209	228	248	282	309	331	536	584	585	585	18	0.000482398	0.424393	36.6099	4.46173
50	Hu_110402_VII_Rachida_49_52	52	-358.297	450.341	2806.7	0.127599	2.03481	0.602364	1	0.153437	NA	1.76842	0.15529	1.78977	1	0.0239183	18.7449	2527	0.00838039	6.56774	17.5905	4.05475	0	0	15	58	105	154	202	245	291	337	833	1156	1458	1501	2	7.23495e-05	0.0567006	40.843	3.95124
51	Hu_110402_VII_Rachida_50_51	50	814.001	-486.356	2764.16	0.075324	1.79615	0.480208	1	0.0851023	NA	1.02547	0.0810644	0.976816	2	0.0151189	20.0718	1382	0.00513829	6.82158	18.1654	4.43432	25	54	86	123	152	184	205	233	257	277	428	551	556	556	0	NA	NA	NA	NA
52	Hu_110402_VII_Rachida_50_51	51	1240.7	-670.741	2849.59	0.0474921	0.964334	0.657664	1	0.0847758	NA	1.02687	0.0876231	1.06135	0	NA	NA	1238	0.00508852	10.7145	18.6932	4.74141	21	46	73	100	125	146	173	205	230	258	505	586	586	586	7	0.000221306	0.465984	38.4246	6.05602
53	Hu_110402_VII_Rachida_53	53	740.136	955.214	3221.89	0.0211497	0.679552	0.544249	1	0.0574361	NA	0.711836	0.0529681	0.656462	0	NA	NA	414	0.00211075	9.98005	20.1086	5.03178	16	30	46	60	79	89	102	107	117	122	154	188	236	252	0	NA	NA	NA	NA
54	Hu_110520_V_Rachida_01	1	1917.36	1348.96	532.099	0.0290763	0.955693	0.478474	1	0.101434	NA	1.36868	0.0906798	1.22358	0	NA	NA	585	0.00136598	4.6979	15.4327	3.96841	14	44	81	118	163	198	227	253	278	298	384	426	436	436	5	0.000170817	0.587477	40.0975	2.85715
55	Hu_110520_V_Rachida_02_03	2	1585.19	559.696	1024.61	0.213471	3.1292	0.552006	1	0.188887	NA	2.22437	0.179146	2.10967	1	0.0259882	12.1741	3428	0.0102456	4.79951	16.6107	4.56363	29	73	120	184	242	293	347	403	447	500	1022	1553	2110	2475	10	0.000289228	0.135488	37.4517	5.10506
56	Hu_110520_V_Rachida_02_03	3	2488.67	913.179	1103.39	0.111947	2.06571	0.54378	1	0.193143	NA	2.52572	0.190381	2.48959	1	0.009011	8.04934	1861	0.00476366	4.25528	15.8909	4.17209	54	121	183	242	273	308	345	382	424	458	829	1292	1454	1486	2	4.51751e-05	0.040354	34.7988	4.37555
57	Hu_110520_V_Rachida_04_05	4	1225.74	-538.49	684.84	0.0559932	1.06768	0.662927	1	0.0631175	NA	0.76395	0.0594895	0.720038	0	NA	NA	1466	0.00361935	6.46392	15.81	3.95323	14	40	68	91	118	151	174	209	240	277	595	757	767	767	8	0.000155378	0.277495	32.0821	7.09224
58	Hu_110520_V_Rachida_04_05	5	1528.28	-535.197	1252.91	0.23708	3.14881	0.588303	1	0.252571	NA	2.94736	0.252342	2.94469	4	0.0562103	23.7094	3750	0.0131847	5.56129	17.6605	4.62352	0	0	6	53	107	167	219	267	314	358	720	882	971	1035	13	0.000278686	0.11755	33.9292	4.39027
59	Hu_110520_V_Rachida_06	6	306.885	364.863	1326.19	0.150674	2.26295	0.605111	1	0.145911	NA	1.86651	0.142271	1.81994	1	0.0213811	14.1903	2641	0.00744075	4.93832	16.5727	4.00054	17	48	77	104	138	191	234	284	346	402	724	897	947	955	13	0.000244703	0.162405	32.7127	3.22717
60	Hu_110520_V_Rachida_07_09	7	-95.6534	1367.19	863.867	0.0754716	1.36475	0.632827	1	0.0382493	NA	0.30829	0.047269	0.380989	1	0.00635642	8.42227	1816	0.00596215	7.89986	16.9155	5.11073	11	19	39	55	69	79	97	113	139	161	324	456	642	754	0	NA	NA	NA	NA
61	Hu_110520_V_Rachida_07_09	9	-429.759	936.585	1427.91	0.135527	2.21869	0.575091	1	0.108277	NA	1.18675	0.106762	1.17014	1	0.00903236	6.66464	3051	0.00999759	7.37684	17.0004	4.99578	26	62	85	118	151	193	222	251	272	301	458	581	806	1019	5	0.000113504	0.0837502	34.7202	4.28063
62	Hu_110520_V_Rachida_08	8	-1382.09	2003.37	1039.76	0.0545832	1.3533	0.514198	1	0.0735399	NA	0.790522	0.0646664	0.695135	1	0.00344212	6.3062	733	0.00344634	6.31393	19.4565	5.09103	8	27	54	75	95	114	129	154	176	197	320	398	434	434	0	NA	NA	NA	NA
63	Hu_110520_V_Rachida_10	10	89.6812	1526.55	1674.39	0.273398	4.11527	0.495012	1	0.180951	NA	2.36635	0.160355	2.09701	3	0.0461428	16.8775	4189	0.0177495	6.4922	19.1125	4.29506	15	51	104	160	224	274	326	386	424	469	856	1211	1489	1777	23	0.0005106	0.186761	34.2079	4.84075
64	Hu_110520_V_Rachida_11	11	673.506	998.425	861.097	0.330654	4.12202	0.560992	1	0.259984	NA	3.00086	0.320889	3.70386	2	0.0402938	12.1861	4310	0.0243119	7.35266	20.6324	5.4299	17	78	128	198	253	322	386	438	489	554	1163	1806	2326	2579	23	0.000489376	0.148002	33.6392	5.06555
65	Hu_110520_V_Rachida_12	12	1156.74	2526.64	1549.21	0.191505	3.90885	0.411044	1	0.136837	NA	1.73913	0.120214	1.52786	2	0.0146925	7.67214	2501	0.00912709	4.76599	17.625	5.09786	0	1	13	34	71	91	123	164	199	229	439	495	495	495	33	0.000657069	0.343109	32.8487	5.20691
66	Hu_110520_V_Rachida_13_15	13	1829.48	2037.8	1260.65	0.341536	5.41044	0.436726	1	0.318178	NA	4.00613	0.277961	3.49976	4	0.0695898	20.3756	2905	0.0166146	4.86469	21.0529	4.85659	0	4	66	135	196	240	288	332	370	405	711	1034	1486	1920	45	0.00113747	0.333045	35.7668	4.85707
67	Hu_110520_V_Rachida_13_15	15	1239.63	1812.34	2004.64	0.253867	3.83943	0.504996	1	0.148843	NA	1.73417	0.131623	1.53353	2	0.0318261	12.5365	5053	0.0116479	4.58821	15.2696	4.1503	0	1	15	52	95	138	186	227	271	316	796	984	994	994	3	7.08615e-05	0.0279129	34.8324	6.28884
68	Hu_110520_V_Rachida_14	14	-1148.21	1035.13	2132.75	0.177544	4.56655	0.334529	1	0.0424567	NA	0.382194	0.0692946	0.623787	1	0.00651371	3.66878	2156	0.0116124	6.54057	20.4223	5.20252	9	14	22	30	40	44	55	64	74	81	184	339	464	526	15	0.000535406	0.301562	39.0472	8.66397
69	Hu_110520_V_Rachida_16_20	16	573.103	3016.85	1875.01	0.0720775	1.23283	0.679385	1	0.0747466	NA	0.858602	0.0742419	0.852804	0	NA	NA	2389	0.00494944	6.86682	14.7836	3.9566	25	56	88	117	144	171	201	228	264	288	671	1032	1318	1523	1	2.37023e-05	0.0328845	35.6394	NA
70	Hu_110520_V_Rachida_16_20	20	684.034	3643.56	1536.06	0.154572	2.58882	0.538026	1	0.154091	NA	1.86045	0.148933	1.79816	1	0.0313488	20.281	2196	0.00651905	4.21747	16.5961	4.59877	20	56	103	143	190	227	255	296	330	350	616	843	1012	1137	28	0.000621678	0.402192	33.7376	6.38226
71	Hu_110520_V_Rachida_17_18	17	-557.077	1854.98	2133.55	0.06632	1.68577	0.470018	1	0.0474951	NA	0.493194	0.0484195	0.502793	0	NA	NA	1051	0.00584844	8.81851	20.9126	4.76268	10	20	37	59	72	86	98	114	132	155	244	258	258	258	2	4.59733e-05	0.0693204	34.8725	5.34257
72	Hu_110520_V_Rachida_17_18	18	-402.733	2624.27	2077.51	0.0462514	1.05756	0.589198	1	0.0539756	NA	0.579015	0.0736107	0.789648	0	NA	NA	974	0.00223454	4.8313	15.1124	4.32402	12	24	34	51	61	70	85	96	104	115	256	449	501	501	0	NA	NA	NA	NA
73	Hu_110520_V_Rachida_19	19	501.052	930.593	2121.42	0.0614767	1.12263	0.670996	1	0.0982202	NA	1.09528	0.098774	1.10146	0	NA	NA	1447	0.00359143	5.84194	15.3211	4.66644	19	40	69	95	113	132	152	168	191	219	543	881	1022	1023	4	0.000106499	0.173235	36.0548	6.94612
74	Hu_110520_V_Rachida_21_22	21	506.993	1977.4	3461.48	0.300869	4.65594	0.466368	1	0.162112	NA	2.00345	0.138602	1.71289	2	0.0384458	12.7782	3213	0.0114073	3.79144	17.7015	4.70122	20	44	66	101	136	162	213	263	309	357	812	1005	1025	1055	31	0.000767325	0.255036	35.54	4.83688
75	Hu_110520_V_Rachida_21_22	22	-418.432	2158.97	3008.55	0.0673529	1.1452	0.699046	1	0.0834333	NA	0.960523	0.0722551	0.831834	1	0.00772615	11.4711	1095	0.00316227	4.69507	16.6738	4.12988	0	0	0	30	57	90	111	131	151	169	343	608	817	841	0	NA	NA	NA	NA
76	Hu_110520_V_Rachida_23	23	1041.36	1329.9	3449.25	0.139333	1.96471	0.661538	1	0.0665727	NA	0.811817	0.0829776	1.01187	2	0.0327893	23.5331	1884	0.00818638	5.87541	19.0352	4.81294	19	41	60	86	102	130	156	187	208	228	496	632	710	819	6	0.000164633	0.118158	36.4329	6.73881
77	Hu_110520_V_Rachida_24_25	24	-289.577	1792.08	971.42	0.077732	1.45399	0.605789	1	0.0845436	NA	1.0631	0.0740201	0.930774	1	0.00674698	8.67981	1568	0.0048224	6.20388	17.0953	4.04918	13	37	61	98	134	162	192	221	251	276	389	400	400	400	0	NA	NA	NA	NA
78	Hu_110520_V_Rachida_24_25	25	-1094.69	1797.68	1019.34	0.0764084	1.31048	0.664479	1	0.0544209	NA	0.609137	0.0471718	0.527997	1	0.00132003	1.7276	1848	0.00504558	6.60343	16.3086	4.15835	13	32	38	51	65	77	90	105	116	131	194	197	197	197	0	NA	NA	NA	NA
79	Hu_160217_III_Rachida_01_02	1	-670.418	-1980.8	2488.75	0.438567	6.58542	0.423895	1	0.245955	NA	2.894	0.202211	2.37929	2	0.0605537	13.8072	2347	0.0351876	8.02329	27.276	9.57559	25	67	92	125	161	190	225	256	282	304	504	711	1033	1343	14	0.00306434	0.698717	73.0213	11.8613
80	Hu_160217_III_Rachida_01_02	2	-1675.09	-1534.41	2571.35	0.444189	4.59549	0.612629	1	0.356312	NA	4.33628	0.370519	4.50918	1	0.0668664	15.0536	2128	0.0288363	6.4919	26.2468	9.2537	61	128	191	250	306	358	414	467	521	571	890	1059	1165	1239	0	NA	NA	NA	NA
81	Hu_160217_III_Rachida_03_06	3	-134.714	-10219	2779.08	0.379468	5.60818	0.451973	1	0.279296	NA	3.77846	0.306307	4.14388	1	0.0602272	15.8715	1939	0.0395341	10.4183	30.1998	10.6279	36	74	114	164	215	250	305	341	377	404	635	730	781	801	5	0.00138515	0.365023	80.4143	6.86994
82	Hu_160217_III_Rachida_03_06	6	-510.41	-11250.1	2468.59	0.365661	4.92183	0.502432	1	0.33381	NA	4.07319	0.278414	3.39724	1	0.0642064	17.559	2091	0.0409917	11.2103	29.4097	10.8959	27	75	113	161	212	259	307	352	403	443	799	962	1008	1035	14	0.0022615	0.618468	66.6105	8.26303
83	Hu_160217_III_Rachida_04_05	4	434.151	-12489.7	2253.53	0.418712	4.38921	0.616654	1	0.399975	NA	5.16367	0.414071	5.34565	1	0.0638994	15.2609	1594	0.0439901	10.5061	33.781	11.5289	0	0	0	22	65	104	139	184	224	256	548	823	1011	1119	5	0.000674029	0.160977	62.2551	10.5491
84	Hu_160217_III_Rachida_04_05	5	683.304	-11441.8	2896.36	0.523837	5.30525	0.592347	1	0.175281	NA	2.00639	0.175912	2.01361	1	0.0688828	13.1497	1841	0.0607731	11.6015	35.7484	12.4082	9	26	59	74	90	105	121	135	163	178	299	382	468	554	17	0.00348197	0.664705	71.4715	11.2935
85	Hu_160217_III_Rachida_07_09	7	-461.583	-11135.1	2741.11	0.288323	7.85224	0.268788	1	0.103305	NA	1.13119	0.100565	1.10118	1	0.0474419	16.4544	1294	0.0283674	9.83877	31.6097	9.96208	0	0	3	18	26	39	51	61	75	90	186	301	425	493	0	NA	NA	NA	NA
86	Hu_160217_III_Rachida_07_09	9	804.229	-12779.7	2419.59	0.411307	5.4792	0.488139	1	0.205244	NA	2.84922	0.185775	2.57895	1	0.0168563	4.09823	3062	0.0417596	10.1529	26.6665	8.91221	44	89	144	193	249	281	318	347	378	409	667	905	1134	1357	18	0.0043712	1.06276	76.2425	9.68687
87	Hu_160217_III_Rachida_08	8	-436.903	-10662	2933.34	1.09011	11.5491	0.44352	1	0.176057	NA	2.35656	0.187464	2.50925	1	0.220452	20.223	2511	0.121429	11.1392	42.6372	10.5722	5	13	31	47	63	79	96	110	123	140	273	431	564	694	14	0.00324188	0.297391	72.3511	17.2777
88	Hu_160217_III_Rachida_10_11	10	-5345.99	3031.66	2340.5	0.142622	2.98854	0.441722	1	0.112202	NA	1.33391	0.116536	1.38544	0	NA	NA	1247	0.0159032	11.1506	25.9582	8.866	32	52	72	106	131	147	167	198	217	239	385	507	530	530	3	0.000633303	0.444045	72.6954	11.6083
89	Hu_160217_III_Rachida_10_11	11	-4633.43	3031.19	2545.7	0.206395	2.7632	0.611228	1	0.176183	NA	2.35369	0.17766	2.37342	0	NA	NA	1751	0.0265436	12.8606	28.0625	8.69799	31	70	95	130	153	179	206	221	236	260	469	712	978	1183	13	0.00194122	0.940537	63.6057	12.6852
90	Hu_160217_III_Rachida_12_15	12	-4960.88	-1519.99	2912.32	0.359678	4.82641	0.50676	1	0.141204	NA	1.68277	0.130612	1.55655	1	0.0111899	3.11107	1265	0.0433104	12.0414	36.6754	11.5957	5	11	21	37	50	61	71	83	98	116	256	392	504	589	5	0.00148159	0.41192	81.522	11.1833
91	Hu_160217_III_Rachida_12_15	15	-4049.32	-2151.31	2754.97	0.626508	7.87472	0.449642	1	0.260848	NA	3.4012	0.239009	3.11644	2	0.166978	26.6521	755	0.0429903	6.86189	45.0079	11.0587	3	17	38	52	70	80	97	106	111	120	200	290	360	403	12	0.00284134	0.45352	75.6281	9.97236
92	Hu_160217_III_Rachida_13_14	13	-80.3693	-5636.43	2802.95	0.110892	2.10015	0.531497	1	0.0891645	NA	1.07925	0.091368	1.10593	0	NA	NA	1126	0.0156249	14.0902	26.8527	8.87801	0	0	0	0	0	2	16	33	51	63	222	342	399	421	10	0.00160982	1.4517	67.1537	5.02649
93	Hu_160217_III_Rachida_13_14	14	87.4371	-4909.84	2351.66	0.179778	2.23517	0.689176	1	0.0816318	NA	1.07872	0.0552352	0.729904	0	NA	NA	991	0.0169255	9.41468	28.4148	10.1427	14	27	38	46	54	71	82	91	108	121	192	255	298	313	1	0.000147825	0.0822266	65.6019	NA
94	Hu_160217_III_Rachida_16_17	16	79.6543	-470.965	2011.24	0.7443	8.12438	0.488869	1	0.156025	NA	2.337	0.154886	2.31995	3	0.0963706	12.9478	2522	0.0474094	6.36967	30.1065	9.27583	16	40	66	100	114	142	164	185	205	226	376	418	449	482	12	0.00385406	0.517811	83.7756	10.5064
95	Hu_160217_III_Rachida_16_17	17	507.846	664.772	2499.19	0.355792	4.00633	0.606087	1	0.165136	NA	2.27675	0.149482	2.06094	1	0.0362296	10.1828	2358	0.0434105	12.2011	29.5275	9.8572	30	55	84	113	139	161	184	210	242	264	463	611	764	917	12	0.0018658	0.524408	65.6004	8.80458
96	Hu_160217_III_Rachida_18	18	-5068.48	-241.557	2824.95	0.19008	3.38235	0.472668	1	0.202889	NA	3.02285	0.180707	2.69236	0	NA	NA	1270	0.0185703	9.76973	27.1194	9.39887	38	79	117	152	181	217	252	278	313	353	612	807	884	921	6	0.00169387	0.891137	77.8319	17.782
97	Hu_160217_III_Rachida_19_20	19	-2696.87	-1811.49	2311.43	0.09804	1.3694	0.750853	1	0.103708	NA	1.45291	0.0998594	1.39899	0	NA	NA	436	0.0137599	14.035	36.0805	10.9291	12	21	35	47	55	60	70	80	82	87	151	231	256	260	2	0.000569048	0.580424	81.6031	0
98	Hu_160217_III_Rachida_19_20	20	-2274.11	-843.508	2033.82	0.194689	2.70439	0.600678	1	0.0535188	NA	0.691195	0.0639301	0.825658	1	0.0499237	25.6428	805	0.0154876	7.95504	29.5244	10.5911	0	0	0	0	0	0	0	0	0	0	48	89	154	209	0	NA	NA	NA	NA
99	Hu_160217_III_Rachida_21	21	-6482.08	1153.55	2062.93	0.115903	1.50234	0.765209	1	0.0915503	NA	1.07436	0.112117	1.31571	0	NA	NA	740	0.0177587	15.322	32.6897	10.1945	0	0	1	7	17	24	33	40	52	57	116	187	277	355	3	0.000687304	0.592998	75.3664	7.99775
100	Hu_160217_III_Rachida_22	22	-4369.14	4053.74	2570.91	0.905218	8.63445	0.524105	1	0.297781	NA	3.64221	0.26833	3.28199	2	0.237773	26.267	2038	0.0403925	4.46219	29.7137	10.766	1	26	72	112	152	193	230	270	297	326	518	612	686	724	38	0.00744881	0.822875	69.5539	13.3104
101	Hu_160217_III_Rachida_23	23	-2560.8	4485.1	2499.19	0.114227	1.78548	0.637637	1	0.0562454	NA	0.89138	0.0486493	0.770997	0	NA	NA	1123	0.0150645	13.1882	26.6995	8.76595	6	12	25	42	55	80	94	108	118	133	246	329	358	359	9	0.0016942	1.48319	67.8877	15.9307
102	Hu_160217_III_Rachida_24_25	24	-2399.27	-6860.02	3179.45	0.311678	3.91081	0.568444	1	0.178764	NA	2.27109	0.174922	2.22228	0	NA	NA	1840	0.0440181	14.123	31.3472	11.99	29	59	94	134	169	217	252	283	306	330	526	633	714	763	4	0.000926583	0.297289	74.2811	13.6252
103	Hu_160217_III_Rachida_24_25	25	-3412.67	-7398.73	2939.57	0.106762	2.10092	0.518029	1	0.115045	NA	1.21579	0.121748	1.28663	0	NA	NA	975	0.0118774	11.1251	25.8442	8.38489	18	41	61	75	100	123	142	160	178	199	369	428	428	428	4	0.000826913	0.774537	69.2095	19.9809
104	Hu_161118_IV_Rachida_01	1	-1074.73	1112.85	1843.48	0.17875	2.20059	0.697338	1	0.182606	NA	2.55248	0.185613	2.59451	1	0.0298268	16.6863	3561	0.00994763	5.5651	16.3353	4.2929	0	18	101	158	241	313	390	453	517	582	1150	1599	1930	2019	11	0.000292671	0.163732	36.0326	6.67054
105	Hu_161118_IV_Rachida_02_03	2	237.167	470.289	1974.57	0.0508403	1.20675	0.549968	1	0.0543041	NA	0.653215	0.0485918	0.584503	1	0.0121537	23.9057	932	0.00164177	3.22927	14.1161	3.43773	23	45	79	113	142	170	192	206	220	235	387	416	416	416	9	0.000282782	0.556217	37.9454	7.21976
106	Hu_161118_IV_Rachida_02_03	3	-141.559	-317.018	2001.2	0.236739	3.72222	0.497196	1	0.21482	NA	2.68805	0.193458	2.42074	1	0.024028	10.1496	2920	0.0151646	6.40563	19.958	5.55205	37	83	148	202	261	305	358	414	474	525	1217	1799	1978	1984	63	0.00198468	0.83834	37.7628	7.35106
107	Hu_161118_IV_Rachida_04_05	4	1628.37	2348.22	2187.98	0.154824	2.62013	0.532174	1	0.114159	NA	1.36832	0.0977025	1.17107	1	0.0192707	12.4468	3197	0.00752363	4.85947	15.1988	4.39465	0	0	28	78	133	197	250	296	346	391	705	917	1073	1101	29	0.000533818	0.34479	32.1411	4.5573
108	Hu_161118_IV_Rachida_04_05	5	1728.83	2683.18	2255.88	0.0123764	0.423908	0.610391	1	0.097949	NA	1.05556	0.114513	1.23407	0	NA	NA	562	0.0010682	8.63095	14.2324	3.97752	42	79	121	167	205	234	271	306	332	349	473	483	483	483	4	7.70493e-05	0.622552	31.4408	9.2424
109	Hu_161118_IV_Rachida_06_07_08_09_10	6	1177.54	1091.35	2014.3	0.0623307	1.32508	0.573734	1	0.166992	NA	1.83631	0.185588	2.0408	1	0.00810255	12.9993	1557	0.00313953	5.0369	14.5004	4.07634	48	109	172	234	305	368	415	471	512	557	903	1076	1163	1163	7	0.000109907	0.176329	30.8906	2.53818
110	Hu_161118_IV_Rachida_06_07_08_09_10	7	1369.71	514.928	2310.4	0.11751	2.23154	0.519913	1	0.102025	NA	1.12096	0.111113	1.22082	0	NA	NA	3076	0.00784499	6.67602	15.8265	4.22031	17	58	109	163	218	273	334	410	463	521	980	1307	1415	1415	13	0.000238481	0.202946	32.2994	3.79708
111	Hu_161118_IV_Rachida_06_07_08_09_10	8	1438.91	986.826	2280.51	0.0228342	0.806477	0.482632	1	0.0782749	NA	0.826745	0.0926933	0.979035	0	NA	NA	846	0.00196601	8.60995	15.1635	4.32831	34	85	130	199	244	288	331	357	392	408	521	553	571	573	19	0.000776544	3.40079	40.9207	9.17519
112	Hu_161118_IV_Rachida_06_07_08_09_10	9	1850.39	572.261	2213.7	0.320907	3.65186	0.620711	1	0.181514	NA	1.83924	0.185252	1.87713	0	NA	NA	2629	0.0092185	2.87263	17.251	5.26089	0	0	0	2	38	86	128	168	215	265	643	927	1092	1162	17	0.000305874	0.0953152	31.9794	4.21455
113	Hu_161118_IV_Rachida_06_07_08_09_10	10	1140.1	656.971	2838.56	0.0442632	1.1708	0.51685	1	0.0939658	NA	1.11202	0.0973246	1.15177	1	0.00397298	8.97582	1274	0.00289353	6.5371	15.17	4.11685	42	87	144	195	234	270	293	320	345	364	498	605	606	606	5	8.45353e-05	0.190983	31.5381	3.51036
114	Hu_161118_IV_Rachida_11	11	2789.54	2785.89	2381.73	0.0367723	0.858777	0.622708	1	0.123251	NA	1.47852	0.133812	1.60521	0	NA	NA	1074	0.00272206	7.40246	15.2842	4.94377	0	30	86	160	214	279	324	377	427	452	678	688	688	688	9	0.000292141	0.794458	37.9801	8.76698
115	Hu_161118_IV_Rachida_12	12	541.995	1546.77	1750.43	0.0753576	1.39814	0.617092	1	0.094004	NA	1.24181	0.0775055	1.02386	0	NA	NA	1888	0.00426461	5.65916	15.0669	4.28073	46	105	158	221	266	303	337	378	423	477	730	820	820	820	10	0.000247373	0.328266	33.3841	10.4059
116	Hu_161118_IV_Rachida_13	13	-427.664	2145.93	2546.82	0.122736	3.55391	0.336066	1	0.0774472	NA	0.790074	0.0900537	0.918679	1	0.00655955	5.34444	1579	0.00881386	7.18116	20.4921	5.58681	12	38	50	71	78	79	80	81	83	83	114	210	383	474	27	0.000644153	0.524829	34.9756	5.18127
117	Hu_161118_IV_Rachida_14_15_16	14	213.27	2588.99	2080.8	0.352073	5.61176	0.429675	1	0.140799	NA	1.4863	0.149364	1.57671	3	0.0426879	12.1247	2971	0.0143732	4.08245	19.5977	5.25158	1	35	77	121	173	241	289	344	397	467	1058	1324	1409	1449	100	0.00232257	0.659684	34.672	5.01937
118	Hu_161118_IV_Rachida_14_15_16	15	1085.68	2709.94	2835.24	0.458847	6.72136	0.428028	1	0.111054	NA	1.33011	0.0874659	1.04759	1	0.0242221	5.2789	4415	0.0212287	4.62652	19.5005	5.29661	35	69	100	127	148	163	180	191	203	213	335	421	493	495	136	0.0031969	0.696724	34.7427	5.21451
119	Hu_161118_IV_Rachida_14_15_16	16	689.077	2519.12	2425.79	0.172317	2.38586	0.627662	1	0.107063	NA	1.37724	0.108863	1.4004	1	0.0149167	8.65656	1672	0.00810222	4.70192	19.3916	5.61636	9	24	54	83	109	136	162	192	215	248	555	792	856	861	18	0.000349205	0.202652	33.0028	3.43367
120	Hu_161118_IV_Rachida_17	17	17.8759	779.369	2586.29	0.0306317	0.885421	0.534706	1	0.0528254	NA	0.528186	0.0446968	0.446911	0	NA	NA	870	0.00195425	6.37984	15.1205	4.10636	25	53	71	92	110	135	151	175	196	219	307	307	307	307	6	0.000165949	0.541756	36.9185	5.216
121	Hu_161118_IV_Rachida_18	18	-445.542	-555.408	2801.81	0.252159	2.97404	0.649013	1	0.255517	NA	3.03934	0.261591	3.11158	1	0.0134537	5.3354	3778	0.0155092	6.15055	18.3826	5.24986	0	12	68	130	191	264	338	392	459	517	1141	1814	2390	2540	75	0.00159417	0.632208	33.2195	6.2704
122	Hu_161118_IV_Rachida_19_21	19	-727.749	1607.16	3330.88	0.081807	1.92221	0.474108	1	0.0981261	NA	1.1846	0.0873177	1.05412	0	NA	NA	2387	0.00551709	6.74403	15.1035	4.43438	0	12	62	124	186	265	337	407	464	546	1195	1287	1287	1287	29	0.000806934	0.986386	36.275	7.27713
123	Hu_161118_IV_Rachida_19_21	21	-485.037	865.403	3319.79	0.248891	4.49756	0.425448	2	0.163164	0.075347	1.33227	0.15801	1.29287	2	0.0450834	18.1137	3539	0.0124451	5.00024	17.271	5.2046	61	150	229	294	364	424	461	506	549	578	777	925	974	978	39	0.0010355	0.416046	35.3694	7.41789
124	Hu_161118_IV_Rachida_20	20	356.127	-532.952	3222.64	0.102087	1.71583	0.615635	1	0.120078	NA	1.3195	0.121205	1.33189	1	0.025032	24.5203	1024	0.00539682	5.28651	20.1155	5.43181	17	40	64	93	125	163	193	240	289	335	621	653	699	699	25	0.000553571	0.542255	34.3173	4.38659
125	Hu_161118_IV_Rachida_22	22	-209.86	-737.482	2477.83	0.0211981	0.542669	0.68257	1	0.0936215	NA	1.14441	0.10127	1.23791	0	NA	NA	470	0.0012131	5.72269	15.6201	4.67219	24	56	84	107	139	162	189	212	231	241	354	358	358	358	4	0.000106394	0.501902	36.9975	1.37087
126	Hu_161118_IV_Rachida_23	23	636.175	2887.39	3451	0.144103	1.90272	0.698594	1	0.0924562	NA	1.16182	0.141595	1.77931	1	0.0077463	5.37554	1837	0.0103409	7.17608	20.5701	5.64509	2	22	44	74	98	119	145	167	201	232	565	855	939	939	40	0.00117077	0.812458	37.6917	4.61197
127	Hu_161118_IV_Rachida_24_25	24	2510.65	1887.25	3213.27	0.0913651	1.74553	0.56201	1	0.0531992	NA	0.596349	0.0503508	0.564419	1	0.0173687	19.0102	712	0.00273686	2.99553	17.836	5.35197	0	0	4	18	35	49	63	75	89	97	144	174	184	184	13	0.000321101	0.351449	34.9835	6.65176
128	Hu_161118_IV_Rachida_24_25	25	2161.45	1882.8	3644.83	0.185367	2.49097	0.631156	1	0.159998	NA	2.13289	0.155224	2.06925	1	0.0230185	12.4178	1645	0.0143852	7.76038	24.0078	6.20462	0	11	34	43	66	84	112	138	173	195	383	516	563	563	65	0.00176237	0.950748	36.6868	4.70283
129	Hu_170801_I_Rachida_01	1	-679.171	3197.75	850.643	0.0259293	0.695183	0.609414	1	0.0548521	NA	0.592016	0.0621728	0.671029	0	NA	NA	1177	0.0025295	9.75536	15.1685	3.52996	37	74	103	130	161	191	213	237	262	289	368	368	368	368	3	8.21919e-05	0.316985	37.0201	4.69055
130	Hu_170801_I_Rachida_02_11	2	-390.632	922.694	1893.88	0.0942161	1.51848	0.659414	1	0.156411	NA	1.89547	0.148091	1.79464	1	0.0135151	14.3448	1959	0.004739	5.02992	15.2823	4.51197	82	165	238	296	354	394	449	527	590	659	1192	1587	1747	1755	10	0.000359148	0.381196	39.4425	8.09065
131	Hu_170801_I_Rachida_02_11	11	141.284	906.972	2176.5	0.0201818	0.522427	0.68617	1	0.0391159	NA	0.408558	0.0391668	0.40909	1	0.00118577	5.87547	464	0.00181614	8.99891	18.1369	5.12476	3	29	43	58	73	85	97	110	126	139	214	232	232	232	0	NA	NA	NA	NA
132	Hu_170801_I_Rachida_03	3	-1241.58	1107.7	926.455	0.101817	1.52036	0.693563	1	0.0851903	NA	0.860418	0.0786244	0.794102	2	0.0164164	16.1234	1242	0.00500396	4.91465	17.9992	5.53863	8	16	27	40	51	59	75	83	93	107	307	462	618	704	20	0.000518329	0.509078	35.5788	6.34592
133	Hu_170801_I_Rachida_04	4	1656.53	1021	781.952	0.0362107	0.836299	0.632917	1	0.0667681	NA	0.781133	0.0716482	0.838226	1	0.00028171	0.777975	1063	0.0033218	9.17355	17.0734	4.23695	23	50	70	99	139	174	204	239	265	288	486	518	518	518	6	0.000170327	0.470379	37.5043	3.93459
134	Hu_170801_I_Rachida_05	5	-150.689	2995.06	746.403	0.0442808	0.99239	0.609928	1	0.0729538	NA	0.92049	0.0666688	0.841189	1	0.00186767	4.21779	1145	0.00333624	7.53428	16.4516	4.52642	15	32	50	77	103	122	150	177	201	225	471	674	698	698	1	2.75873e-05	0.0623009	37.489	NA
135	Hu_170801_I_Rachida_06	6	-1685.2	2915.69	1286.77	0.0179173	0.456748	0.724974	1	0.050489	NA	0.56916	0.0525146	0.591994	0	NA	NA	504	0.00157903	8.8129	16.9157	4.58745	10	27	42	62	78	96	115	136	158	179	322	339	339	339	4	0.000110006	0.613967	35.9808	8.40893
136	Hu_170801_I_Rachida_07	7	31.5464	4001.5	1303.5	0.0276047	0.692857	0.637522	1	0.0396228	NA	0.48907	0.0353769	0.436662	0	NA	NA	489	0.00211333	7.65568	18.1179	6.14302	13	24	43	53	65	85	106	125	150	169	261	284	284	284	1	2.47607e-05	0.0896974	36.1622	NA
137	Hu_170801_I_Rachida_08	8	-2384.83	2345.41	1511.87	0.211527	3.38577	0.507074	1	0.0747019	NA	0.84709	0.0706376	0.801002	2	0.0502607	23.7609	2589	0.0108589	5.13356	18.2707	5.57954	12	29	50	63	80	86	99	114	124	135	303	345	364	394	19	0.000799713	0.378066	41.2172	9.25844
138	Hu_170801_I_Rachida_09	9	123.999	-916.863	1482.65	0.168661	2.28087	0.647231	1	0.219046	NA	2.74213	0.218647	2.73713	1	0.0135902	8.05772	2554	0.012703	7.53166	19.6117	5.59803	15	76	129	186	239	291	347	402	476	545	1134	1512	1569	1569	21	0.0010003	0.593084	42.5183	10.7195
139	Hu_170801_I_Rachida_10_12	10	240.958	860.094	1740.56	0.106978	2.10781	0.517029	1	0.202583	NA	2.61555	0.174892	2.25804	1	0.0187488	17.5259	1892	0.0062763	5.86692	17.2272	4.68607	50	146	260	334	424	498	572	646	713	764	996	1090	1090	1090	12	0.000273257	0.255433	33.7334	7.37063
140	Hu_170801_I_Rachida_10_12	12	-89.8076	594.318	1137.9	0.0381653	0.902958	0.607103	1	0.0808544	NA	0.934674	0.0783329	0.905524	1	0.00276346	7.24077	730	0.00272495	7.13985	17.6063	5.39124	19	38	64	92	122	142	174	207	237	259	405	445	445	445	0	NA	NA	NA	NA
141	Hu_170801_I_Rachida_13_14	13	-1753.95	-1099.95	1443.66	0.0909456	1.6357	0.597909	1	0.0930784	NA	1.19068	0.0939835	1.20225	1	0.0112064	12.3221	2036	0.00792483	8.71381	18.0051	5.17399	19	56	94	132	172	194	218	236	259	273	384	405	405	405	2	7.32387e-05	0.0805302	41.0113	3.95037
142	Hu_170801_I_Rachida_13_14	14	-1156.33	-1669.94	1132.44	0.0466532	1.29393	0.48435	1	0.112181	NA	1.32669	0.0953355	1.12747	0	NA	NA	1206	0.00460988	9.88116	17.5565	5.67567	53	98	153	212	271	329	386	428	475	515	587	589	589	589	0	NA	NA	NA	NA
143	Hu_170801_I_Rachida_15_16	15	-2627.53	-2099.34	1058.99	0.0630351	1.31126	0.584142	1	0.0662026	NA	0.518564	0.0672779	0.526987	0	NA	NA	1492	0.00489622	7.76746	16.722	5.31757	1	2	9	18	26	39	59	73	84	103	333	572	601	601	11	0.000223314	0.354269	33.4318	3.84282
144	Hu_170801_I_Rachida_15_16	16	-2708.54	-1236.1	1221.15	0.08359	1.58007	0.585118	1	0.119993	NA	1.39322	0.115378	1.33964	1	0.0170418	20.3873	1357	0.0044687	5.34597	17.2534	4.54734	26	62	95	152	186	228	263	301	340	381	731	944	1020	1076	25	0.000761855	0.911418	37.009	8.11649
145	Hu_170801_I_Rachida_17	17	-1546.82	-737.355	1287.83	0.0928397	1.6528	0.59991	1	0.0825657	NA	0.970883	0.083515	0.982046	1	0.0168053	18.1014	1040	0.00367721	3.96081	17.2451	5.33327	22	67	103	152	189	226	247	283	320	336	405	470	500	500	8	0.00015219	0.163928	32.7575	3.67414
146	Hu_170801_I_Rachida_18_19	18	-875.749	3215.48	2651.74	0.172643	2.84136	0.527704	1	0.120315	NA	1.46401	0.117566	1.43056	2	0.0204572	11.8494	3226	0.009148	5.2988	15.9641	5.0172	30	84	145	197	244	299	345	395	448	502	922	1103	1117	1117	25	0.000572169	0.331417	34.7099	4.37682
147	Hu_170801_I_Rachida_18_19	19	-480.488	3326.85	2309.28	0.0242267	0.72181	0.56095	1	0.0717789	NA	0.750205	0.0771562	0.806407	0	NA	NA	669	0.0015371	6.34464	14.9779	4.53214	11	28	43	52	74	93	113	132	156	188	312	350	350	350	6	0.000341802	1.41085	46.1329	9.5945
148	Hu_170801_I_Rachida_20	20	-1484.44	2844.62	2838.57	0.0491759	0.935546	0.693831	1	0.178923	NA	2.15546	0.10837	1.30551	0	NA	NA	1162	0.00407436	8.28527	17.304	5.17676	71	159	215	268	321	369	430	498	557	624	1020	1118	1122	1122	0	NA	NA	NA	NA
149	Hu_170801_I_Rachida_21_22	21	-2572.96	-175.78	1063.53	0.0749865	1.27944	0.672128	1	0.056959	NA	0.722322	0.0647338	0.820918	0	NA	NA	1400	0.00546834	7.29243	17.9994	5.30289	9	19	24	36	45	53	62	74	77	95	241	292	295	295	12	0.000234044	0.312115	32.7389	4.86468
150	Hu_170801_I_Rachida_21_22	22	-2273.8	-12.6031	1581.54	0.182595	2.6461	0.588217	1	0.0730959	NA	0.874715	0.0722519	0.864615	0	NA	NA	1514	0.00755092	4.13534	19.1042	6.26276	23	53	85	104	125	137	147	152	159	163	242	307	310	310	9	0.000889092	0.486921	51.2904	19.5698
Abbreviation: NA=Not analyzed. Some structural parameters could not be amalyzed since they were not present in the corresponding synaptic bouton.
